# Supplementary material
Source: ML conference proceedings conference paper supplement (https://openreview.net/forum?id=IfRHdBy3wb)
Supplement: supplementary_material [file attachment]

## 1 A Proof of Lemma 2

2 *Proof.* We prove by contradiction. Suppose Lemma 2 is false, then either of the following shall hold:

- 3 i) There exists two variables  $\{X_i, X_j\} \subset \mathbf{X}$ , which are not equally contribute to  $g(\mathbf{X})$  at  
4  $(x_i, x_j)$  with respect to  $(0, 0)$ ;
- 5 ii) There are two variables  $X_i, X_j \subset \mathbf{X}$  that cannot have  $X_i = x_i$  and  $X_j = 0$  simultaneously,  
6 or  $X_i = 0$  and  $X_j = x_j$  simultaneously.

7 We consider contradiction to each of the above statements separately.

- 8 i) According to Definition 1, if there exists two variables  $\{X_i, X_j\} \subset \mathbf{X}$ , which are not equally  
9 contribute to  $g(\mathbf{X})$  at  $(x_i, x_j)$  with respect to  $(0, 0)$ , we should have at least one assignment of  $\mathbf{X}$   
10 except for  $X_i$  and  $X_j$  such that

$$g_{X_i=x_i, X_j=0}(\mathbf{X} \setminus \{X_i, X_j\}) \neq g_{X_i=0, X_j=x_j}(\mathbf{X} \setminus \{X_i, X_j\}).$$

11 However, since

$$g_{X_i=x_i, E_j=0}(\mathbf{X} \setminus \{X_i, X_j\}) = g_{X_i=0, X_j=x_j}(\mathbf{X} \setminus \{X_i, X_j\}) = 0,$$

12 we have reached a contradiction to the first statement.

- 13 ii) As all the variables are uncorrelated, the value assigned to one variable has no impact on how  
14 we choose values for the other variables. Therefore, it is possible to have  $X_i = x_i$  and  $X_j = 0$   
15 simultaneously or to have  $X_i = 0$  and  $X_j = x_j$  simultaneously for arbitrary two variables  $X_i$  and  
16  $X_j$ . We have reached a contradiction to the second statement.  $\square$

## 17 B Proof of Lemma 4

18 *Proof.* To prove Lemma 4, we first prove the following Lemma.

- 19 **Lemma B.1.** For a scalar product term  $z$  in the expansion form of a pretrained GNN  $f(\cdot)$ , when  
20 the number of nodes  $N$  is large, it is feasible to have both  $\nu_i = x_i$  and  $\nu_j = 0$  or both  $\nu_i = 0$  and  
21  $\nu_j = x_j$  for all possible pairs  $\nu_i, \nu_j$  of variables in  $z$ , where  $x_i, x_j$  indicate the presence of variables  
22  $\nu_i, \nu_j$ , respectively.

23 *Proof.* We first show that in the scenario of a large number of nodes  $N$ , an arbitrary variable  $P_{c,e}$   
24 among the variables in  $z$  can take any value within its domain while keeping all other variables in  $z$   
25 fixed to certain values.

26 We begin with defining notations. For a scalar product term  $z$  in the expansion of a pretrained  
27 GNN  $f(\cdot)$ , we let  $\mathbf{U} = A_{\alpha_{L0}, \alpha_{L1}}^{(L)} \dots A_{\alpha_{10}, \alpha_{11}}^{(1)}$  denotes the factors involving the adjacency matrix  $A$ ,  
28  $\mathbf{P} = P_{\alpha_{10}, \beta_{11}}^{(1)} \dots P_{\alpha_{L0}, \beta_{L1}}^{(L)} \cdot P_{\alpha_{L0}, \gamma_{11}}^{(c_1)} \dots P_{\alpha_{L0}, \gamma_{(M-1)1}}^{(c_{M-1})}$  denotes the factors involving the activation  
29 pattern  $P$ , and  $\mathbf{C} = W_{\beta_{10}, \beta_{11}}^{(1)} \dots W_{\beta_{L0}, \beta_{L1}}^{(L)} \cdot W_{\gamma_{10}, \gamma_{11}}^{(c_1)} \dots W_{\gamma_{M0}, \gamma_{M1}}^{(c_M)}$  stands for “reduced to constant”  
30 denoting the product of the related parameters in  $f(\cdot)$ , such that each product term can be rewritten  
31 as  $z = \mathbf{U} \mathbf{P} X_{i,j} \mathbf{C}$ .

32 The entries in an activation pattern are determined by the hidden representation before being passed  
33 to the activation function. Similar to Equation (9), the  $(c, e)$ -th entry of the hidden representation  
34 at the  $l$ -th layer before the activation function can be expressed by the sum of all the related scalar  
35 products as

$$h_{c,e}^{(l)'} = \sum^{\alpha, \beta, \rho} \left[ \left( A_{c, \alpha_{l1}}^{(l)} W_{\beta_{l0}, e}^{(l)} \prod_{m=1}^{l-1} P_{\alpha_{m0}, \beta_{m1}}^{(m)} A_{\alpha_{m0}, \alpha_{m1}}^{(m)} W_{\beta_{m0}, \beta_{m1}}^{(m)} \right) X_{\rho_{m0}, \rho_{m1}} \right].$$

36 When none of the variables in  $h_{c,e}^{(l)'}$  are constrained, the mathematical range of  $h_{c,e}^{(l)'}$  is  $\mathbb{R}$ . Let  $c(h_{c,e}^{(l)'}, z)$   
37 be the sum of scalar products involving the variables in  $z$ . If the range of  $(h_{c,e}^{(l)'}, c(h_{c,e}^{(l)'}, z))$  is also  
38  $\mathbb{R}$  when none of the variables in it is constrained, then  $P_{c,e}$  can take any value within its domain  
39 while keeping the variables in  $z$  fixed to some certain values. In other words, if there is at least one

40 scalar product in  $(h_{c,e}^{(l)'} - c(h_{c,e}^{(l)'}, z))$ , then  $P_{c,e}$  can take any value within its domain while holding  
 41 the variables in  $z$  fixed to certain values.

42 The sum of scalar products involving  $X_{i,j}$  is

$$c(h_{c,e}^{(l)'}, X_{i,j}) = \sum_{\alpha,\beta} \left[ \left( A_{c,\alpha_{l1}}^{(l)} W_{\beta_{l0},e}^{(l)} \prod_{m=1}^{l-1} P_{\alpha_{m0},\beta_{m1}}^{(m)} A_{\alpha_{m0},\alpha_{m1}}^{(m)} W_{\beta_{m0},\beta_{m1}}^{(m)} \right) X_{i,j} \right].$$

43 The sum of scalar products involving an arbitrary variable  $A_{a,b}$  in  $\mathbf{U}$  is

$$c(h_{c,e}^{(l)'}, A_{a,b}) = \sum_{\alpha,\beta,\rho} \left[ \left( A_{c,\alpha_{l1}}^{(l)} W_{\beta_{l0},e}^{(l)} \prod_{m=1}^{l-1} P_{\alpha_{m0},\beta_{m1}}^{(m)} A_{\alpha_{m0},\alpha_{m1}}^{(m)} W_{\beta_{m0},\beta_{m1}}^{(m)} \right) X_{\rho_{m0},\rho_{m1}} \right], \text{ where}$$

at least one of  $\{A_{c,\alpha_{l1}}^{(l)}, A_{\alpha_{(l-1)0},\alpha_{(l-1)1}}^{(l-1)}, \dots, A_{\alpha_{10},\alpha_{11}}^{(1)}\}$  is  $A_{a,b}$ .

44 The sum of scalar products involving an arbitrary variable  $P_{g,h}$  in  $\mathbf{P}$  is

$$c(h_{c,e}^{(l)'}, P_{g,h}) = \sum_{\alpha,\beta,\rho} \left[ \left( A_{c,\alpha_{l1}}^{(l)} W_{\beta_{l0},e}^{(l)} \prod_{m=1}^{l-1} P_{\alpha_{m0},\beta_{m1}}^{(m)} A_{\alpha_{m0},\alpha_{m1}}^{(m)} W_{\beta_{m0},\beta_{m1}}^{(m)} \right) X_{\rho_{m0},\rho_{m1}} \right], \text{ where}$$

one of  $\{P_{\alpha_{(l-1)0},\beta_{(l-1)1}}^{(l-1)}, \dots, P_{\alpha_{10},\beta_{11}}^{(1)}\}$  is  $P_{g,h}$ .

45 Then the number of scalar products in  $(h_{c,e}^{(l)'} - c(h_{c,e}^{(l)'}, z))$  is

$$|h_{c,e}^{(l)'} - c(h_{c,e}^{(l)'}, z)| \geq |h_{c,e}^{(l)'}| - |c(h_{c,e}^{(l)'}, X_{i,j})| - l \cdot |c(h_{c,e}^{(l)'}, A_{a,b})| - (l-1) \cdot |c(h_{c,e}^{(l)'}, P_{g,h})|,$$

46 where  $|h_{c,e}^{(l)'}|, |c(h_{c,e}^{(l)'}, X_{i,j})|, |c(h_{c,e}^{(l)'}, A_{a,b})|, |c(h_{c,e}^{(l)'}, P_{g,h})|$  represents the number of scalar prod-  
 47 ucts in  $h_{c,e}^{(l)'}, c(h_{c,e}^{(l)'}, X_{i,j}), c(h_{c,e}^{(l)'}, A_{a,b}), c(h_{c,e}^{(l)'}, P_{g,h})$  respectively. Hence if we can prove  $|h_{c,e}^{(l)'}| -$   
 48  $|c(h_{c,e}^{(l)'}, X_{i,j})| - l \cdot |c(h_{c,e}^{(l)'}, A_{a,b})| - (l-1) \cdot |c(h_{c,e}^{(l)'}, P_{g,h})| \geq 1$ , then we will also have  
 49  $|h_{c,e}^{(l)'} - c(h_{c,e}^{(l)'}, z)| \geq 1$  proved. That is, we should prove

$$\frac{|h_{c,e}^{(l)'}|}{|h_{c,e}^{(l)'}|} - \frac{|c(h_{c,e}^{(l)'}, X_{i,j})|}{|h_{c,e}^{(l)'}|} - l \cdot \frac{|c(h_{c,e}^{(l)'}, A_{a,b})|}{|h_{c,e}^{(l)'}|} - (l-1) \cdot \frac{|c(h_{c,e}^{(l)'}, P_{g,h})|}{|h_{c,e}^{(l)'}|} \geq \frac{1}{|h_{c,e}^{(l)'}|}.$$

50 Equivalently, we should prove

$$\frac{|c(h_{c,e}^{(l)'}, X_{i,j})|}{|h_{c,e}^{(l)'}|} + l \cdot \frac{|c(h_{c,e}^{(l)'}, A_{a,b})|}{|h_{c,e}^{(l)'}|} + (l-1) \cdot \frac{|c(h_{c,e}^{(l)'}, P_{g,h})|}{|h_{c,e}^{(l)'}|} \leq 1 - \frac{1}{|h_{c,e}^{(l)'}|}.$$

51 Note that the first term

$$\frac{|c(h_{c,e}^{(l)'}, X_{i,j})|}{|h_{c,e}^{(l)'}|} = \frac{1}{Nd}.$$

52 Since  $d \geq 1$  is the feature dimension of  $X$ , we have  $\lim_{N \rightarrow \infty} \frac{|c(h_{c,e}^{(l)'}, X_{i,j})|}{|h_{c,e}^{(l)'}|} = 0$ .

53 Now consider the second term  $l \cdot \frac{|c(h_{c,e}^{(l)'}, A_{a,b})|}{|h_{c,e}^{(l)'}|}$ :

$$\begin{aligned} l \cdot \frac{|c(h_{c,e}^{(l)'}, A_{a,b})|}{|h_{c,e}^{(l)'}|} &= l \cdot \frac{\binom{l}{1}N^{(l-1)} + \binom{l}{2}N^{(l-2)} + \dots + \binom{l}{l}N^0}{N^{(l+1)}} \\ &= l \cdot \left( \frac{\binom{l}{1}}{N^2} + \frac{\binom{l}{2}}{N^3} + \dots + \frac{\binom{l}{l}}{N^{(l+1)}} \right) \\ &= l \cdot \left( \frac{l!}{1!(l-1)! \cdot N^2} + \frac{l!}{2!(l-2)! \cdot N^3} + \dots + \frac{l!}{l!(l-l)! \cdot N^{(l+1)}} \right) \\ &= \left( \frac{l}{1!N} \cdot \frac{l}{N} \right) + \left( \frac{l}{2!N} \cdot \frac{l}{N} \cdot \frac{l-1}{N} \right) + \dots + \left( \frac{l}{l!N} \cdot \frac{l}{N} \cdot \frac{l-1}{N} \dots \frac{1}{N} \right). \end{aligned}$$

54 Since  $N \gg l$ , we have  $\lim_{N \rightarrow \infty} \frac{l}{N} = 0$ . Also, because  $\frac{l}{N} > \frac{l-1}{N} > \dots > \frac{1}{N} > \frac{1}{1!N} > \dots > \frac{1}{l!N}$ ,  
 55 we then have  $\lim_{N \rightarrow \infty} l \cdot \frac{|c(h_{c,e}^{(l)'}, A_{a,b})|}{|h_{c,e}^{(l)'}|} = 0$ .

56 Now we consider the third term  $(l-1) \cdot \frac{|c(h_{c,e}^{(l)'}, P_{g,h})|}{|h_{c,e}^{(l)'}|}$ :

$$(l-1) \cdot \frac{|c(h_{c,e}^{(l)'}, P_{g,h})|}{|h_{c,e}^{(l)'}|} = (l-1) \cdot \frac{1}{N^l d}$$

57 Since  $N \gg l$  and  $d \geq 1$ , we have  $\lim_{N \rightarrow \infty} (l-1) \cdot \frac{|c(h_{c,e}^{(l)'}, P_{g,h})|}{|h_{c,e}^{(l)'}|} = 0$ .

58 For the terms on the right hand side of the inequality, since  $\frac{1}{|h_{c,e}^{(l)'}|} \leq \frac{|c(h_{c,e}^{(l)'}, X_{i,j})|}{|h_{c,e}^{(l)'}|}$ , we have  
 59  $\lim_{N \rightarrow \infty} \frac{1}{|h_{c,e}^{(l)'}|} = 0$ . Hence  $\lim_{N \rightarrow \infty} 1 - \frac{1}{|h_{c,e}^{(l)'}|} = 1$ .

60 Since  $0 < 1$ , we have prove that when  $N$  is large,  $\frac{|c(h_{c,e}^{(l)'}, X_{i,j})|}{|h_{c,e}^{(l)'}|} + l \cdot \frac{|c(h_{c,e}^{(l)'}, A_{a,b})|}{|h_{c,e}^{(l)'}|} + (l-1) \cdot$   
 61  $\frac{|c(h_{c,e}^{(l)'}, P_{g,h})|}{|h_{c,e}^{(l)'}|} \leq 1 - \frac{1}{|h_{c,e}^{(l)'}|}$ . Therefore, in scenarios with a large number of nodes  $N$ , an arbitrary  
 62 variable  $P_{c,e}$  in  $\mathbf{P}$  can take any value within its domain while keeping all other variables in  $z$  fixed to  
 63 certain values.

64 If the data is properly preprocessed, a feature  $X_{i,j}$  and the unique entries in  $A$  should be uncorrelated  
 65 with each other. Also, from the above proof we can conclude that when  $N$  is large, any arbitrary  
 66 variables in  $z$  can be freely set to “absence” or “presence” without affecting other variables. That is, in  
 67 scenarios with a large number of nodes  $N$ , it is always feasible to hold

- 68 • both  $X_{i,j} = 0$  and  $A_{a,b} = A_{a,b}$ , as well as both  $X_{i,j} = x_{i,j}$  and  $A_{a,b} = 0$ ;
- 69 • both  $A_{k,n} = 0$  and  $A_{a,b} = A_{a,b}$ , as well as both  $A_{k,n} = A_{k,n}$  and  $A_{a,b} = 0$ ;
- 70 • both  $X_{i,j} = 0$  and  $P_{c,e} = p_{c,e}$ , as well as both  $X_{i,j} = x_{i,j}$  and  $P_{c,e} = 0$ ;
- 71 • both  $A_{a,b} = 0$  and  $P_{c,e} = p_{c,e}$ , as well as both  $A_{a,b} = A_{a,b}$  and  $P_{c,e} = 0$ ;
- 72 • both  $P_{c,e} = 0$  and  $P_{g,h} = p_{g,h}$ , as well as  $P_{c,e} = p_{c,e}$  and  $P_{g,h} = 0$ ,

73 without affecting other variables in  $z$ , where  $X_{i,j}, A_{a,b}, A_{k,n}, P_{c,e}, P_{g,h}$  refers to the variables in  $z$ .  
 74 Hence we have proved Lemma B.1.  $\square$

75 Next, we prove by contradiction that for all possible variable pairs  $(\nu_i, \nu_j)$  among the unique variables  
 76 in  $z$ , we have  $(\nu_i, \nu_j)$  contribute equally to  $z$  at  $(x_i, x_j)$  with respect to  $(0, 0)$ , where  $\nu_i = x_i, \nu_j = x_j$   
 77 means the “presence” of the variables.

78 Assume there exists two variables  $(\nu_i, \nu_j)$  in  $V(z)$  that are not equally contribute to  $z$  at  $(x_i, x_j)$  with  
 79 respect to  $(0, 0)$ . Then by Definition 1, we should have one assignment of other variables in  $z$ , such  
 80 that

$$z_{\nu_i=x_i, \nu_j=0}(V(z) \setminus \{\nu_i, \nu_j\}) \neq z_{\nu_i=0, \nu_j=x_j}(V(z) \setminus \{\nu_i, \nu_j\}).$$

81 However, since

$$z_{\nu_i=x_i, \nu_j=0}(V(z) \setminus \{\nu_i, \nu_j\}) = z_{\nu_i=0, \nu_j=x_j}(V(z) \setminus \{\nu_i, \nu_j\}) = 0,$$

82 we have reached a contradiction. Hence we have proved Lemma 4.  $\square$

## 83 C Proof of Theorem 5

84 *Proof.* If the total number of unique variables in a scalar product equals to the total number of  
 85 occurrences of all the unique variables, i.e., if  $|V(z)| = \sum_{\rho \in z} O(\rho, z)$ , we will have  $I_\nu(z) =$   
 86  $\frac{z}{|V(z)|} = \frac{O(\nu, z)}{\sum_{\rho \in z} O(\rho, z)}$ . This is because when  $|V(z)| = \sum_{\rho \in z} O(\rho, z)$ , all the occurrences of  
 87 variables are unique variables, and we have  $O(\nu, z) = 1$ . Consider  $I_\nu(f_{m,n}(\cdot))$  as the sum of two

88 components, which are the contribution  $I_\nu(f_{m,n}^{V=O}(\cdot))$  of  $\nu$  to the scalar products where  $|V(z)| =$   
 89  $\sum_{\rho \text{ in } z} O(\rho, z)$  holds, and the contribution  $I_\nu(f_{m,n}^{V \neq O}(\cdot))$  of  $\nu$  to the scalar products where  $|V(z)| =$   
 90  $\sum_{\rho \text{ in } z} O(\rho, z)$  does not hold. That is,

$$I_\nu(f_{m,n}(\cdot)) = I_\nu(f_{m,n}^{V=O}(\cdot)) + I_\nu(f_{m,n}^{V \neq O}(\cdot)).$$

91 We are not able to have multiple occurrences of  $X$  or  $P$  in a scalar product, but only able to have  
 92 multiple occurrences of  $A$ . Considering the scalar products are bounded by a value of  $c$ , we have

$$\begin{aligned} \frac{I_\nu(f_{m,n}^{V \neq O}(\cdot))}{I_\nu(f_{m,n}(\cdot))} &\leq \frac{c \cdot \left[ \binom{L}{2} N^{L-1} + \dots + \binom{L}{L} N \right]}{c \cdot N^{L+1}} \\ &= \frac{L! N^{L-1}}{2!(L-2)! N^{L+1}} + \dots + \frac{L! N}{(L)! 0! N^{L+1}} \\ &= \frac{L(L-1)}{2! N^2} + \dots + \frac{1}{N^L} \\ &\leq \frac{L^2}{N^2} + \dots + \frac{L^2}{N^2}, \end{aligned}$$

93 Since  $N \gg L$ , we have

$$\lim_{N \rightarrow \infty} \frac{I_\nu(f_{m,n}^{V \neq O}(\cdot))}{I_\nu(f_{m,n}(\cdot))} = 0.$$

94 Therefore, when  $N$  is large,  $I_\nu(f_{m,n}(\cdot)) = I_\nu(f_{m,n}^{V=O}(\cdot))$ . Hence, by Equation (10), we have proved  
 95 that when  $N$  is large,  $I_\nu(f_{m,n}(\cdot)) = \sum_{z \text{ in } f_{m,n}(\cdot) \text{ that contain } \nu} \frac{O(\nu, z)}{\sum_{\rho \text{ in } z} O(\rho, z)} \cdot z$ .  $\square$

## 96 **D Case study: Explaining GraphSAGE (SAmple and aggreGatE)**

97 GraphSAGE adopts concatenation at the COMBINE step, hence the hidden state of a GraphSAGE's  
 98  $l$ -th layer is

$$H^{(l)} = \text{ReLU} \left( AH^{(l-1)} W^{(l)\phi} + H^{(l-1)} W^{(l)\psi} + B^{(l)} \right), \quad (\text{D.1})$$

99 where  $W^{(l)\phi}$  and  $W^{(l)\psi}$  represents the trainable parameters for concatenating the node information  
 100 and its neighborhood information. Suppose a GraphSAGE network  $f(A, X)$  has three message-  
 101 passing layers and a 2-layer MLP as the classifier, then its expansion form without the activation  
 102 functions  $\text{ReLU}(\cdot)$  will be

$$\begin{aligned} f(A, X)_{\mathbf{p}} &= XW^{(1)\psi} W^{(2)\psi} W^{(3)\psi} W^{(c_1)} W^{(c_2)} + A^{(1)} XW^{(1)\phi} W^{(2)\psi} W^{(3)\psi} W^{(c_1)} W^{(c_2)} \\ &+ A^{(2)} XW^{(1)\psi} W^{(2)\phi} W^{(3)\psi} W^{(c_1)} W^{(c_2)} + A^{(3)} XW^{(1)\psi} W^{(2)\psi} W^{(3)\phi} W^{(c_1)} W^{(c_2)} \\ &+ A^{(2)} A^{(1)} XW^{(1)\phi} W^{(2)\phi} W^{(3)\psi} W^{(c_1)} W^{(c_2)} \\ &+ A^{(3)} A^{(1)} XW^{(1)\phi} W^{(2)\psi} W^{(3)\phi} W^{(c_1)} W^{(c_2)} \\ &+ A^{(3)} A^{(2)} XW^{(1)\psi} W^{(2)\phi} W^{(3)\phi} W^{(c_1)} W^{(c_2)} \\ &+ A^{(3)} A^{(2)} A^{(1)} XW^{(1)\phi} W^{(2)\phi} W^{(3)\phi} W^{(c_1)} W^{(c_2)} \\ &+ A^{(2)} B^{(1)} W^{(2)\phi} W^{(3)\psi} W^{(c_1)} W^{(c_2)} + A^{(3)} B^{(1)} W^{(2)\psi} W^{(3)\phi} W^{(c_1)} W^{(c_2)} \\ &+ A^{(3)} A^{(2)} B^{(1)} W^{(2)\phi} W^{(3)\phi} W^{(c_1)} W^{(c_2)} + B^{(1)} W^{(2)\psi} W^{(3)\psi} W^{(c_1)} W^{(c_2)} \\ &+ A^{(3)} B^{(2)} W^{(3)\phi} W^{(c_1)} W^{(c_2)} + B^{(2)} W^{(3)\psi} W^{(c_1)} W^{(c_2)} \\ &+ B^{(3)} W^{(c_1)} W^{(c_2)} + B^{(c_1)} W^{(c_2)} + B^{(c_2)}. \end{aligned} \quad (\text{D.2})$$

103 Then all the other steps will be identical to the case study of GCN. The code of explaining GraphSAGE  
 104 on the graph classification task is in the package of Supplementary Material.

## 105 **E Case Study: Explaining Graph Isomorphism Network (GIN)**

106 GIN adopts weighted sum at the COMBINE step, hence the hidden state of a GIN's  $l$ -th layer is:

$$H^{(l)} = \Phi^{(l)} \left( \hat{A} H^{(l-1)} + \epsilon^{(l)} H^{(l-1)} \right), \quad (\text{E.3})$$

107 where  $\hat{A} = A + I$  refers to the adjacency matrix with the self-loops,  $\epsilon^{(l)}$  is a trainable scalar parameter.  
 108 If  $\Phi^{(l)}(\cdot)$  is a 2-layer MLP, expanding  $\Phi^{(l)}$ , we have

$$H^{(l)} = \text{ReLU} \left( \text{ReLU} \left( \hat{A} H^{(l-1)} W^{\Phi_1^{(l)}} + \epsilon^{(l)} H^{(l-1)} W^{\Phi_1^{(l)}} + B^{\Phi_1^{(l)}} \right) W^{\Phi_2^{(l)}} + B^{\Phi_2^{(l)}} \right). \quad (\text{E.4})$$

109 Suppose a GIN  $f(\hat{A}, X)$  has three message-passing layers and a 2-layer MLP as the classifier, then  
 110 its expansion form without the activation functions  $\text{ReLU}(\cdot)$  will be

$$\begin{aligned} f(\hat{A}, X)_{\mathbf{p}} = & X \epsilon^{(3)} \epsilon^{(2)} \epsilon^{(1)} W^{\Phi_1^{(1)}} W^{\Phi_2^{(1)}} W^{\Phi_1^{(2)}} W^{\Phi_2^{(2)}} W^{\Phi_1^{(3)}} W^{\Phi_2^{(3)}} W^{(c_1)} W^{(c_2)} \\ & + \hat{A}^{(1)} X \epsilon^{(3)} \epsilon^{(2)} W^{\Phi_1^{(1)}} W^{\Phi_2^{(1)}} W^{\Phi_1^{(2)}} W^{\Phi_2^{(2)}} W^{\Phi_1^{(3)}} W^{\Phi_2^{(3)}} W^{(c_1)} W^{(c_2)} \\ & + \hat{A}^{(2)} X \epsilon^{(3)} \epsilon^{(1)} W^{\Phi_1^{(1)}} W^{\Phi_2^{(1)}} W^{\Phi_1^{(2)}} W^{\Phi_2^{(2)}} W^{\Phi_1^{(3)}} W^{\Phi_2^{(3)}} W^{(c_1)} W^{(c_2)} \\ & + \hat{A}^{(3)} X \epsilon^{(2)} \epsilon^{(1)} W^{\Phi_1^{(1)}} W^{\Phi_2^{(1)}} W^{\Phi_1^{(2)}} W^{\Phi_2^{(2)}} W^{\Phi_1^{(3)}} W^{\Phi_2^{(3)}} W^{(c_1)} W^{(c_2)} \\ & + \hat{A}^{(2)} \hat{A}^{(1)} X \epsilon^{(3)} W^{\Phi_1^{(1)}} W^{\Phi_2^{(1)}} W^{\Phi_1^{(2)}} W^{\Phi_2^{(2)}} W^{\Phi_1^{(3)}} W^{\Phi_2^{(3)}} W^{(c_1)} W^{(c_2)} \\ & + \hat{A}^{(3)} \hat{A}^{(1)} X \epsilon^{(2)} W^{\Phi_1^{(1)}} W^{\Phi_2^{(1)}} W^{\Phi_1^{(2)}} W^{\Phi_2^{(2)}} W^{\Phi_1^{(3)}} W^{\Phi_2^{(3)}} W^{(c_1)} W^{(c_2)} \\ & + \hat{A}^{(3)} \hat{A}^{(2)} X \epsilon^{(1)} W^{\Phi_1^{(1)}} W^{\Phi_2^{(1)}} W^{\Phi_1^{(2)}} W^{\Phi_2^{(2)}} W^{\Phi_1^{(3)}} W^{\Phi_2^{(3)}} W^{(c_1)} W^{(c_2)} \\ & + \hat{A}^{(3)} \hat{A}^{(2)} \hat{A}^{(1)} X W^{\Phi_1^{(1)}} W^{\Phi_2^{(1)}} W^{\Phi_1^{(2)}} W^{\Phi_2^{(2)}} W^{\Phi_1^{(3)}} W^{\Phi_2^{(3)}} W^{(c_1)} W^{(c_2)} \\ & + \epsilon^{(3)} \epsilon^{(2)} B^{\Phi_1^{(1)}} W^{\Phi_2^{(1)}} W^{\Phi_1^{(2)}} W^{\Phi_2^{(2)}} W^{\Phi_1^{(3)}} W^{\Phi_2^{(3)}} W^{(c_1)} W^{(c_2)} \\ & + \hat{A}^{(2)} \epsilon^{(3)} B^{\Phi_1^{(1)}} W^{\Phi_2^{(1)}} W^{\Phi_1^{(2)}} W^{\Phi_2^{(2)}} W^{\Phi_1^{(3)}} W^{\Phi_2^{(3)}} W^{(c_1)} W^{(c_2)} \\ & + \hat{A}^{(3)} \epsilon^{(2)} B^{\Phi_1^{(1)}} W^{\Phi_2^{(1)}} W^{\Phi_1^{(2)}} W^{\Phi_2^{(2)}} W^{\Phi_1^{(3)}} W^{\Phi_2^{(3)}} W^{(c_1)} W^{(c_2)} \\ & + \hat{A}^{(3)} \hat{A}^{(2)} B^{\Phi_1^{(1)}} W^{\Phi_2^{(1)}} W^{\Phi_1^{(2)}} W^{\Phi_2^{(2)}} W^{\Phi_1^{(3)}} W^{\Phi_2^{(3)}} W^{(c_1)} W^{(c_2)} \\ & + \epsilon^{(3)} \epsilon^{(2)} B^{\Phi_2^{(1)}} W^{\Phi_1^{(2)}} W^{\Phi_2^{(2)}} W^{\Phi_1^{(3)}} W^{\Phi_2^{(3)}} W^{(c_1)} W^{(c_2)} \\ & + \hat{A}^{(2)} \epsilon^{(3)} B^{\Phi_2^{(1)}} W^{\Phi_1^{(2)}} W^{\Phi_2^{(2)}} W^{\Phi_1^{(3)}} W^{\Phi_2^{(3)}} W^{(c_1)} W^{(c_2)} \\ & + \hat{A}^{(3)} \epsilon^{(2)} B^{\Phi_2^{(1)}} W^{\Phi_1^{(2)}} W^{\Phi_2^{(2)}} W^{\Phi_1^{(3)}} W^{\Phi_2^{(3)}} W^{(c_1)} W^{(c_2)} \\ & + \hat{A}^{(3)} \hat{A}^{(2)} B^{\Phi_2^{(1)}} W^{\Phi_1^{(2)}} W^{\Phi_2^{(2)}} W^{\Phi_1^{(3)}} W^{\Phi_2^{(3)}} W^{(c_1)} W^{(c_2)} \\ & + \hat{A}^{(3)} B^{\Phi_1^{(2)}} W^{\Phi_2^{(2)}} W^{\Phi_1^{(3)}} W^{\Phi_2^{(3)}} W^{(c_1)} W^{(c_2)} \\ & + \epsilon^{(3)} B^{\Phi_1^{(2)}} W^{\Phi_2^{(2)}} W^{\Phi_1^{(3)}} W^{\Phi_2^{(3)}} W^{(c_1)} W^{(c_2)} \\ & + \hat{A}^{(3)} B^{\Phi_2^{(2)}} W^{\Phi_1^{(3)}} W^{\Phi_2^{(3)}} W^{(c_1)} W^{(c_2)} + \epsilon^{(3)} B^{\Phi_2^{(2)}} W^{\Phi_1^{(3)}} W^{\Phi_2^{(3)}} W^{(c_1)} W^{(c_2)} \\ & + B^{\Phi_1^{(3)}} W^{\Phi_2^{(3)}} W^{(c_1)} W^{(c_2)} + B^{\Phi_2^{(3)}} W^{(c_1)} W^{(c_2)} + B^{(c_1)} W^{(c_2)} + B^{(c_2)}. \end{aligned} \quad (\text{E.5})$$

111 Then similar to the case study on GCN and GraphSAGE, the activation patterns are multiplied to  
 112 each of the scalar products. Although Equation (E.5) may appear complex, we can observe a pattern  
 113 that when  $\hat{A}^{(l)}$  is present in a product term, the corresponding  $\epsilon^{(l)}$  is not. This observation allows us  
 114 to simplify the expression by using for loops to cover all the product terms. The code of explaining  
 115 GIN on the graph classification task is in the package of Supplementary Material.

## 116 F Handling Batch Normalization Layer

117 In certain cases, Batch Normalization (BN) may be applied between the message-passing layers. In  
 118 this section, we will elaborate on how BN layer is handled to provide explanations with *GOAt*. The  
 119 formula of BN is

$$y = \frac{x - \mu}{\sqrt{\delta + \varepsilon}} \cdot W + B, \quad (\text{F.6})$$

120 where  $\mu$  is the running mean,  $\delta$  is the running variance,  $\varepsilon$  is a prefixed small value,  $W, B$  are learnable  
 121 parameters. During the evaluation mode of a pretrained GNN,  $\mu, \delta, \varepsilon, W$  and  $B$  are fixed. As a result,  
 122 we can treat the Batch Normalization (BN) layer as a linear mapping  $y = xW^{(\text{BN})} + B^{(\text{BN})}$  while

obtaining GNN explanations with *GOAt*, where

$$W^{(BN)} = \frac{W}{\sqrt{\delta + \varepsilon}}, B^{(BN)} = \frac{-\mu \cdot W}{\sqrt{\delta + \varepsilon}} + B. \quad (F.7)$$

## G Fidelity Results of Explaining GraphSAGE and GIN

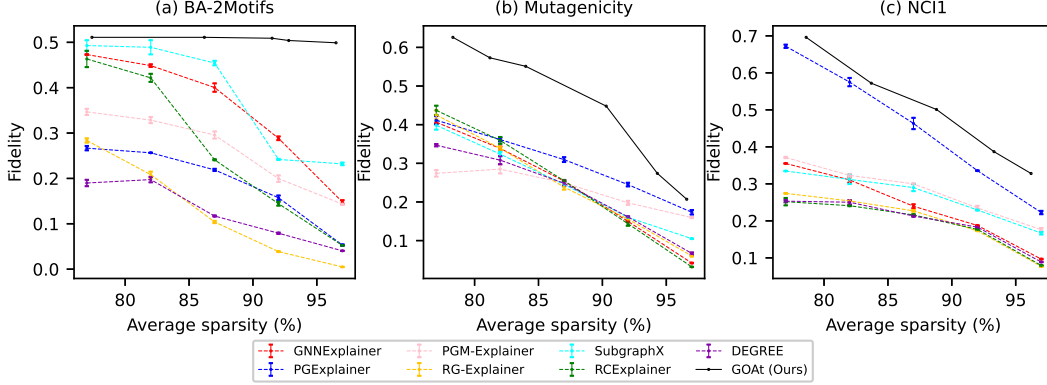

Figure G.1: Fidelity performance averaged across 10 runs on the pretrained GraphSAGE for the datasets at different levels of average sparsity.

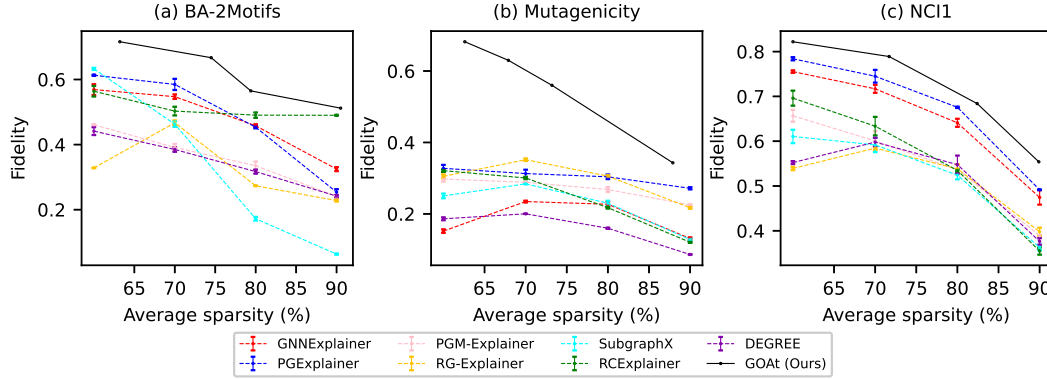

Figure G.2: Fidelity performance averaged across 10 runs on the pretrained GIN for the datasets at different levels of average sparsity.

## H Statistics and Implementation Details

The GNNs are trained using the following data splits: 80% for the training set, 10% for the validation set, and 10% for the testing set. All experiments are conducted on an Intel® Core™ i7-10700 Processor and NVIDIA GeForce RTX 3090 Graphics Card. The GNN architectures consist of 3 message-passing layers and a 2-layer classifier. The hidden dimension is set to 32 for BA-2Motifs, BA-Shapes, BA-Community, Tree-grid, and 64 for Mutagenicity and NCI1. The code is available in the Supplementary Material, provided alongside this Appendix file.

Table H.1: Statistics of the datasets used and the classification accuracy of the trained GNNs.

|               |           | BA-Shapes | BA-Community | Tree-Grid | BA-2Motifs | Mutagenicity | NCI1  |
|---------------|-----------|-----------|--------------|-----------|------------|--------------|-------|
| # Graphs      |           | 1         | 1            | 1         | 1,000      | 4,337        | 4,110 |
| # Nodes (avg) |           | 700       | 1,400        | 1,231     | 25         | 30.32        | 29.87 |
| # Edges (avg) |           | 4,110     | 8,920        | 3,410     | 25.48      | 30.77        | 32.30 |
| # Classes     |           | 4         | 8            | 2         | 2          | 2            | 2     |
| Test ACC      | GCN       | 0.97      | 0.91         | 0.97      | 1.00       | 0.82         | 0.81  |
|               | GraphSAGE | -         | -            | -         | 1.00       | 0.80         | 0.80  |
|               | GIN       | -         | -            | -         | 1.00       | 0.89         | 0.83  |

## 132 I Visualization of Explanation Embeddings on Mutagenicity and NCI1

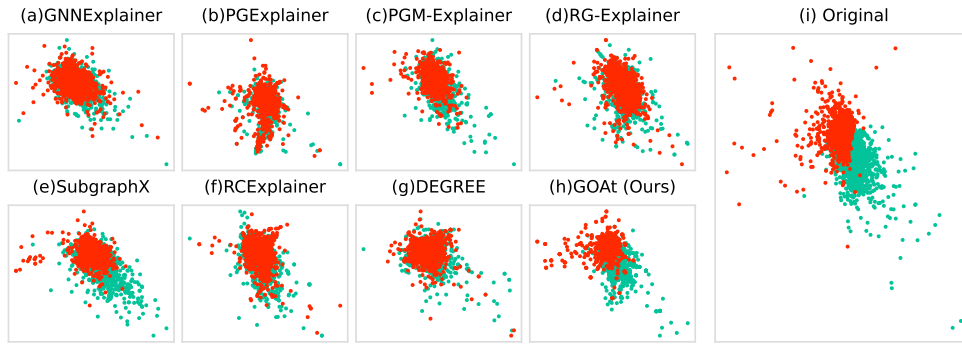

Figure I.3: Visualization of explanation embeddings on the Mutagenicity dataset. Subfigure (i) refers to the visualization of the original embeddings by directly feeding the original data into the GNN without any modifications or explanations applied.

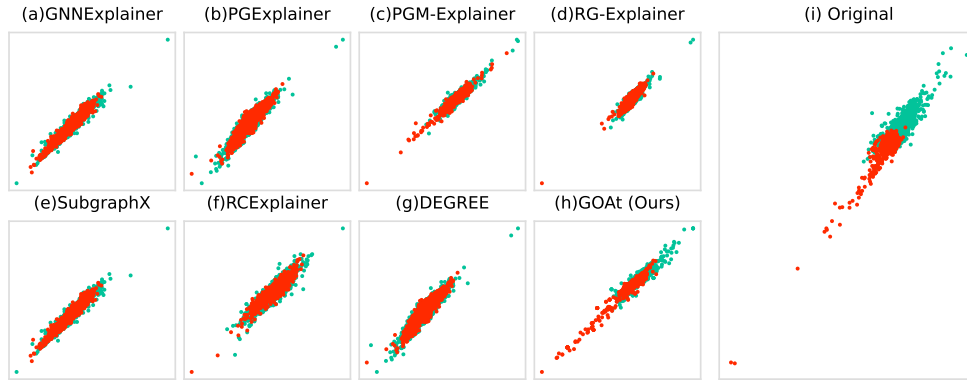

Figure I.4: Visualization of explanation embeddings on the NCI1 dataset. Subfigure (i) refers to the visualization of the original embeddings by directly feeding the original data into the GNN without any modifications or explanations applied.

133 Figure I.3 and Figure I.4 presented the visualization of explanation embeddings on the Mutagenicity  
 134 and NCI1 datasets respectively. To create smaller plots, we have disabled the axes in Figure I.3  
 135 and Figure I.4. In Figure I.5, we have enabled the axes for specific subplots to showcase the disper-  
 136 sion of explanation embeddings from *GOAt* compared to SubgraphX and the original embeddings.  
 137 Specifically, in the case of Mutagenicity, although the explanations generated by SubgraphX exhibit  
 138 only some overlap, the scatters for different classes appear quite close. On the other hand, *GOAt*  
 139 produces more discriminative explanations. For the NCI1 dataset, while the majority of explanations  
 140 generated by SubgraphX overlap, the explanations from *GOAt* exhibit greater dispersion in the scatter  
 141 plot. Furthermore, compared to the original embeddings, the explanations generated by *GOAt* for

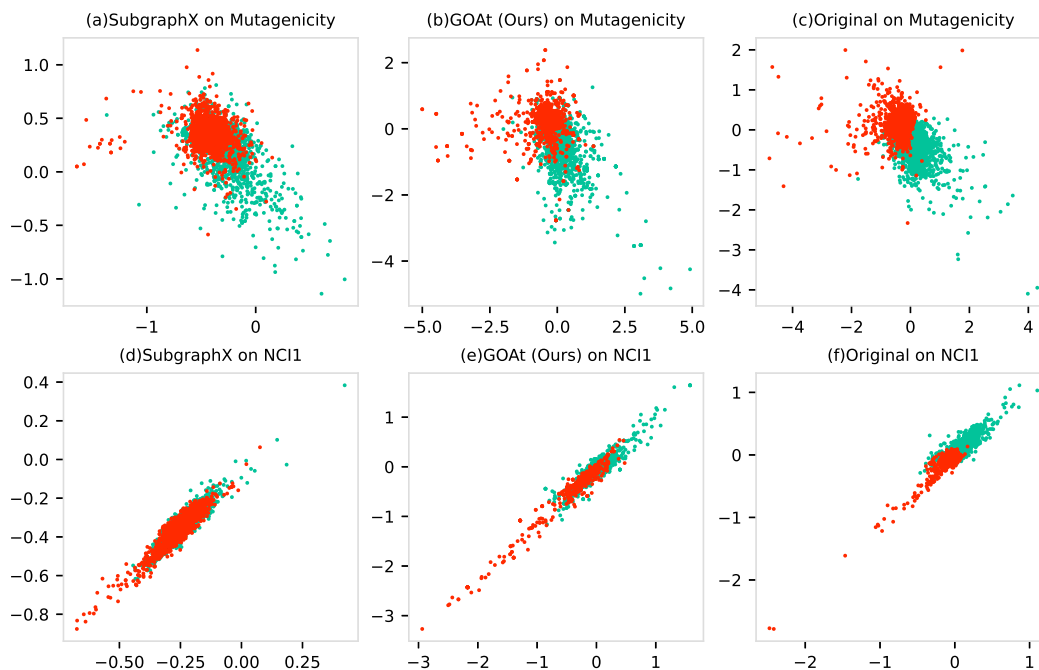

Figure I.5: Visualization of explanation embeddings on the Mutagenicity and NCI1 datasets with axes turned on.

142 NCI1 demonstrate higher confidence towards specific classes, as evident from the bottom-left area in  
 143 Figure I.5(e).

## 144 J Explanations of Node Classification

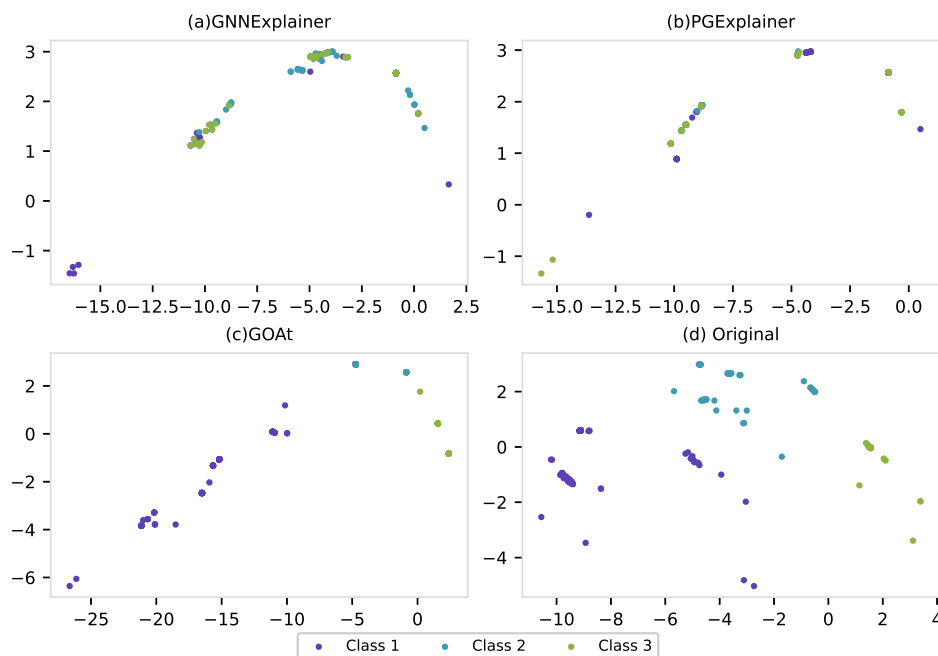

Figure J.6: Visualization of explanation embeddings on the BA-Shapes dataset. Subfigure (d) refers to the visualization of the original embeddings by directly feeding the original data into the GNN without any modifications or explanations applied.

We utilize scatter plots to visually depict the explanation embeddings produced by GNNExplainer, PGExplainer, and GOAt, and compare them with the node embeddings in the original graphs. In the generated figures, we set the value of *topk* to be 6, 7, and 14 for the BA-Shapes, BA-Community, and Tree-Grid datasets, respectively. In the case of BA-Shapes and BA-Community, we only plot the nodes within the house-shape motif, as the other nodes are located far away and may not be easily discernible in terms of explanation performance.

As presented in Figure J.8, the majority of the explanations on the Tree-Grid dataset generated by GNNExplainer are closely clustered together, and *GOAt* has fewer overlapped data points than PGExplainer. As illustrated in Figure J.6 and Figure J.7, the explanations generated by GNNExplainer and PGExplainer fail to exhibit class discrimination on BA-Shapes and BA-Community datasets, as all the data points are clustered together without any distinct separation. In contrast, our method, *GOAt*, generates explanations that clearly and effectively distinguish between classes, with fewer overlapping points and substantial separation distances, highlighting the strong discriminability of our approach on the node classification task.

**Discussion on the AUC/Accuracy metrics.** Many existing GNN explanation approaches are evaluated using metrics such as AUC or Accuracy. These metrics compare the explanations generated by the explainers with "ground-truth" explanations that are predetermined by humans. Ground-truth explanations refer to the underlying evidence that leads to the correct label, rather than the prediction label itself. However, as highlighted by [1] there can often be a mismatch between the ground truth and the GNN. To avoid any potential misunderstandings, we have chosen to directly present scatter plots of the explanations generated by different explainers.

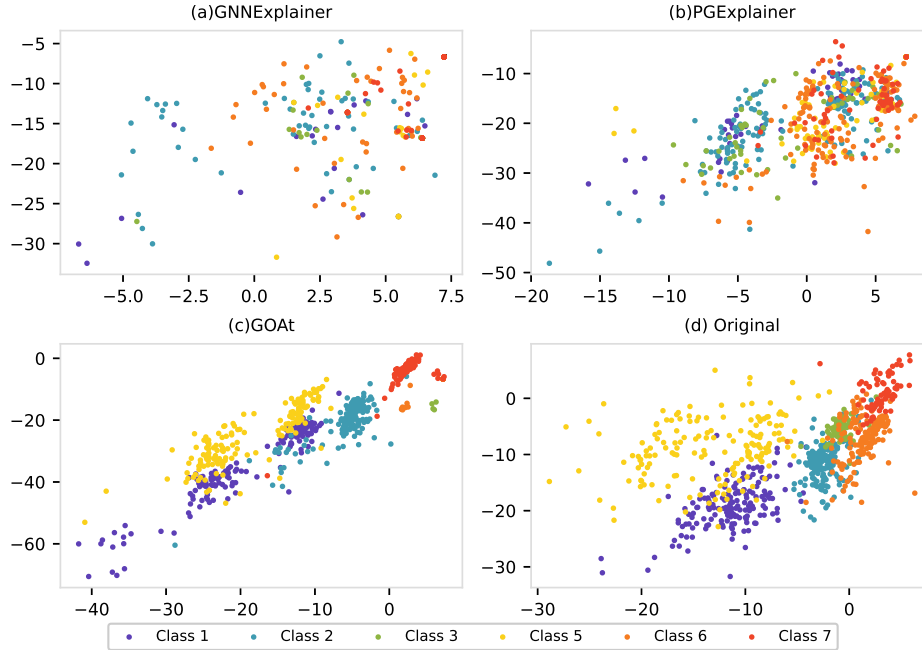

Figure J.7: Visualization of explanation embeddings on the BA-Community dataset. Subfigure (d) refers to the visualization of the original embeddings by directly feeding the original data into the GNN without any modifications or explanations applied.

## K Broader Impacts and Limitations

Our technique aims to contribute to the community's understanding of the decision-making process in GNNs and enhance the reliability of these models. We hope that our approach will be valuable in advancing the field and fostering greater trust and transparency in GNNs. The core concept of our proposed GNN explaining approach, *GOAt*, which is based on "Equal Contribution in the scalar product," can potentially be extended to explain other neural networks, including CNNs. However,

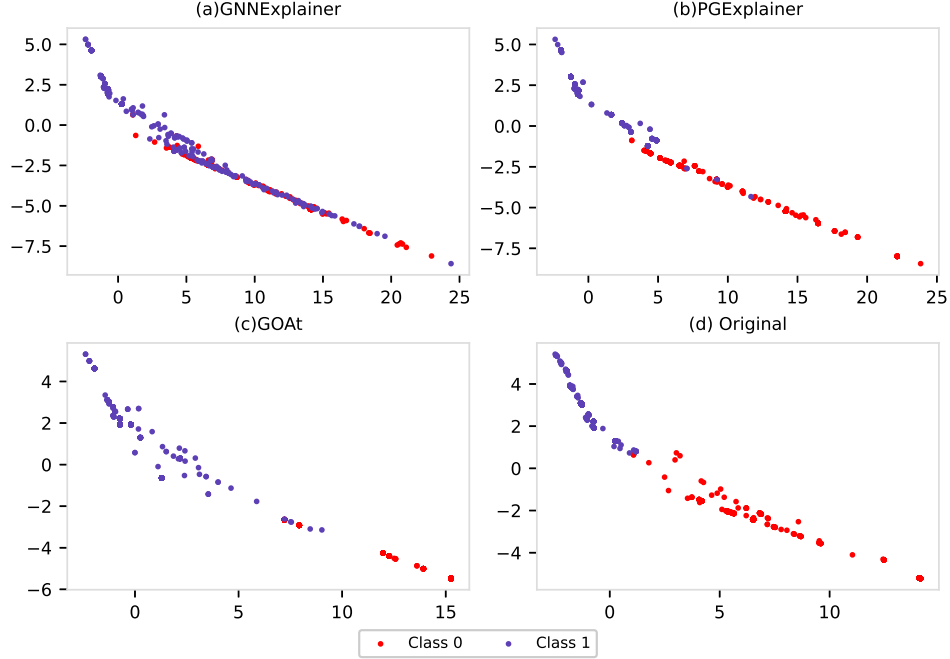

Figure J.8: Visualization of explanation embeddings on the Tree-Grid dataset. Subfigure (d) refers to the visualization of the original embeddings by directly feeding the original data into the GNN without any modifications or explanations applied.

it is important to note that our technique currently requires expert knowledge to design specific explaining flows for different neural network architectures. While our method works well for shallow networks like GNNs, it may become more challenging for deeper networks such as Transformers or ResNets, where the explaining flows can become complex. In such cases, it may be necessary to group or prune scalar products that contribute minimally to the outputs. These are potential areas for future research and investigation.

## References

- [1] Lukas Faber, Amin K. Moghaddam, and Roger Wattenhofer. When comparing to ground truth is wrong: On evaluating gnn explanation methods. In *Proceedings of the 27th ACM SIGKDD Conference on Knowledge Discovery & Data Mining*, pages 332–341, 2021.
